# Supplementary material
Source: PubMed Central journal article supplement (PMC3082853)
Supplement: NIHMS118222-supplement-Supp_Data.pdf [file NIHMS118222-supplement-Supp_Data.pdf]

**Supplemental Figures**  
for  
**Fluoresceination of FepA during Colicin B Killing: Effects of  
Temperature, Toxin and TonB**

Chuck R. Smallwood<sup>§</sup>, Amparo Gala Marco<sup>§</sup>, Qiaobin Xiao, Vy Trinh,  
Salette M. C. Newton, and Phillip E. Klebba\*

\*Address correspondence to: Phillip E. Klebba, Department of Chemistry & Biochemistry,  
University of Oklahoma, Norman, OK 73019, [peklebba@ou.edu](mailto:peklebba@ou.edu); 405-325-4969

<sup>§</sup> Contributed equally to this work

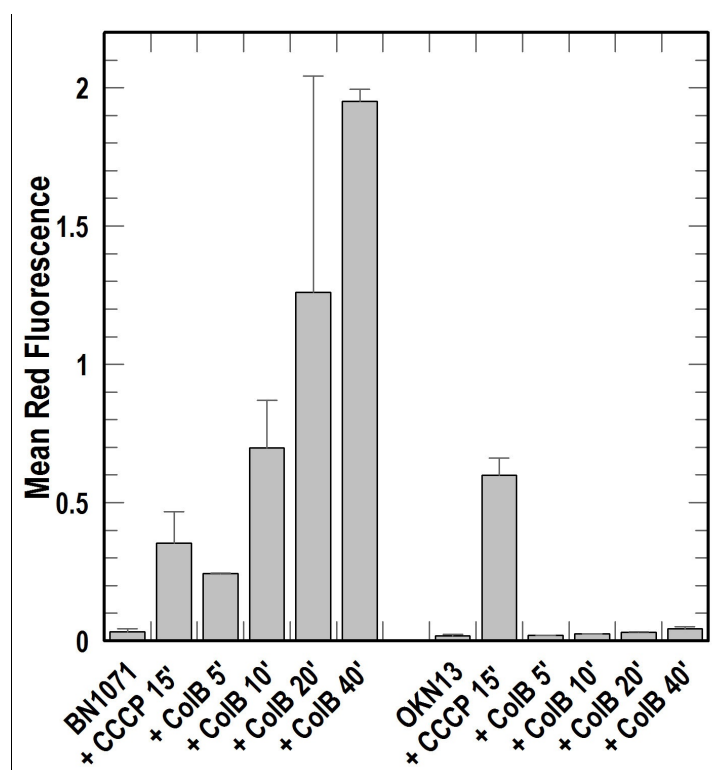

**Figure S1. Kinetics of ColB-mediated lethality.** *E. coli* strains BN1071 (*fepA*<sup>+</sup>, *tonB*<sup>+</sup>) and OKN13 (*fepA*, *tonB*) were grown overnight in LB broth, subcultured into MOPS minimal media and grown to mid-log phase, exposed to the depolarizing agents CCCP or ColB for the indicated times, stained with DiOC<sub>2</sub>(3), and cytofluorimetrically analyzed for red fluorescence. Depolarization of the bacterial cytoplasmic membrane results in an increase in red fluorescence of cell-associated DiOC<sub>2</sub>(3). CCCP depolarized both BN1071 and OKN13, whereas ColB only depolarized the former, *fepA*<sup>+</sup>*tonB*<sup>+</sup> strain, within 40 minutes of addition of the toxin. The figure shows the mean fluorescence values from two experiments, and the associated standard errors of the means.

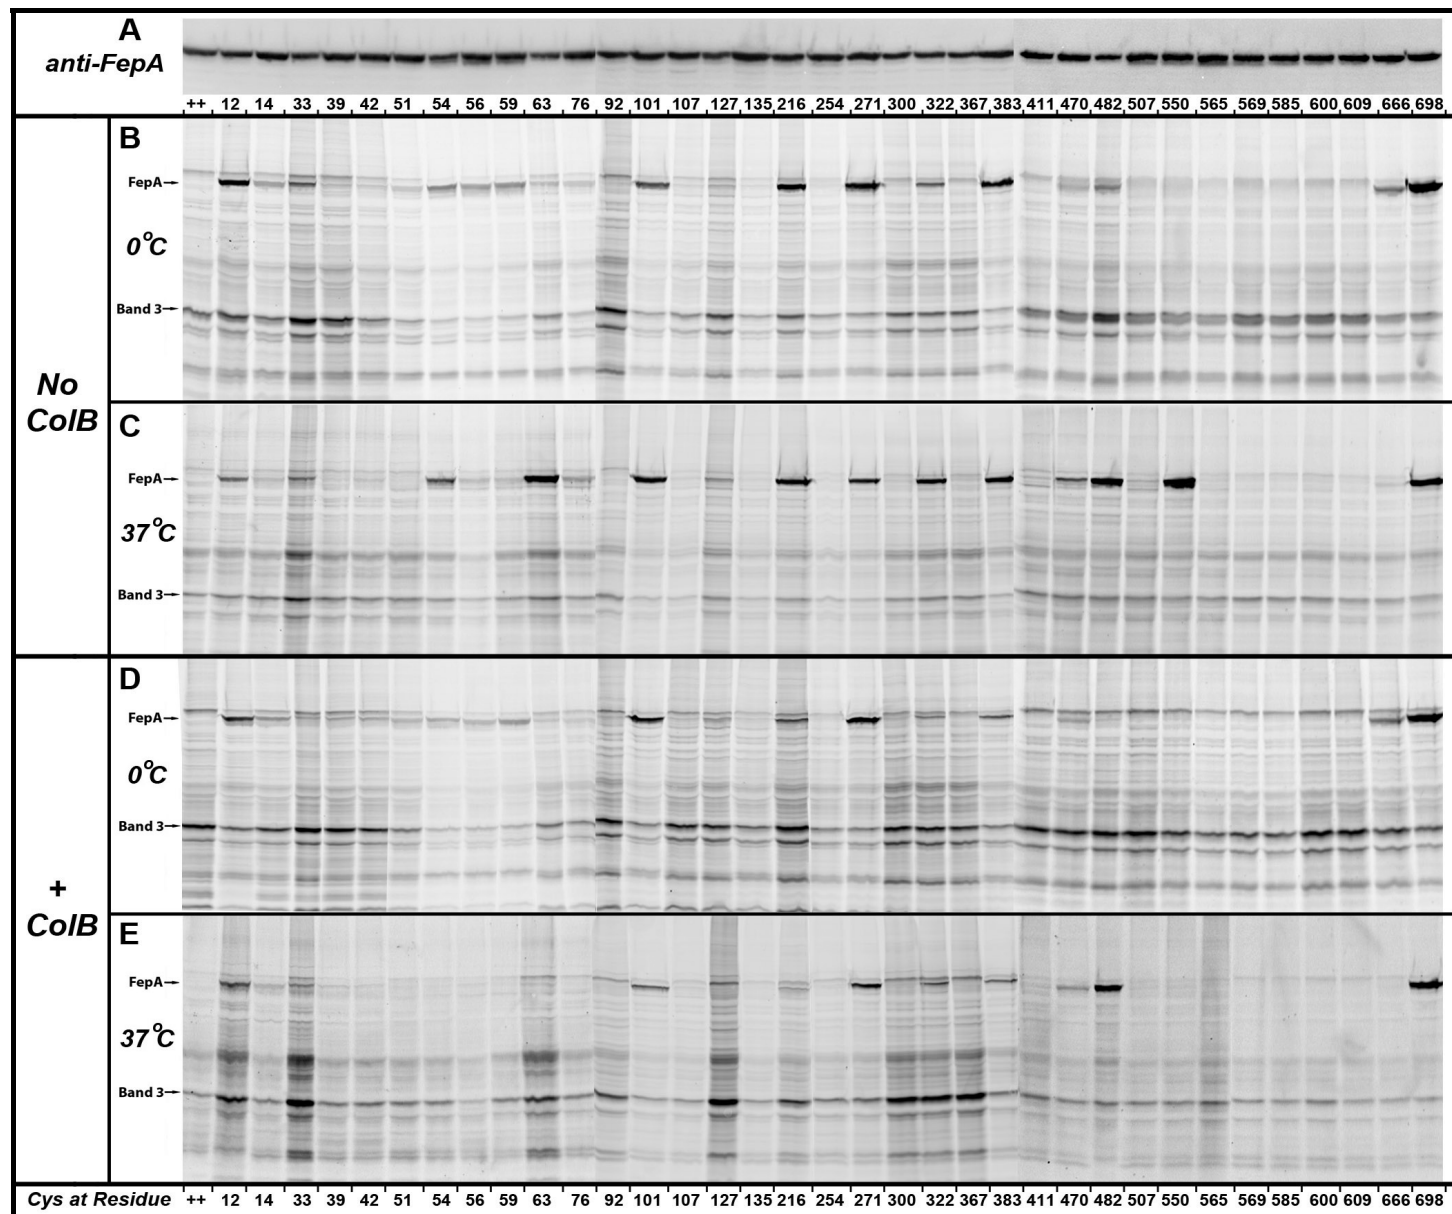

**Figure S2. Representative images from scanned immunoblots and gels, which when quantified, produced Fig. 1. A. Expression.** Synthesis of FepA was visualized by anti-FepA immunoblots. SDS-PAGE gels of fluoresceinated cell lysates were transferred to nitrocellulose, incubated with anti-FepA MAb 45 (Murphy et al., 1990), [<sup>125</sup>I]-protein A (Newton et al., 1999), and scanned on a StormScan phosphorimager. In this panel and B-E, the composite image joins 3 separate immunoblots or SDS-PAGE gels (gel 1:residues 12-76; gel 2: 92-383; gel 3: 411-698) that were scanned on a StormScanner (Molecular Dynamics). **B. FM-labeling at 0 °C.** After harvest bacteria were chilled to 0 °C on ice, collected by centrifugation, resuspended in ice-cold PBS, incubated on ice for 30 min, and exposed to FM at 0 °C for 15 min. **C. FM-labeling at 37 °C.** Cells were manipulated as in panel B, but after resuspension in cold PBS they were incubated for 30 min at 37 °C prior to exposure to FM at 37 °C for 15 min. **D. FM-labeling at 0 °C plus ColB.** Cells were manipulated as in panel B, but exposed to a 15-fold excess of ColB (relative to [FepA]) for 30 min at 0 °C prior to exposure to FM at 0 °C for 15 min. **E. FM-labeling at 37 °C plus ColB.** Cells were manipulated as in panel B, but exposed to an 15-fold excess of ColB (relative to [FepA]) for 30 min at 37 °C prior to exposure to FM at 37 °C for 15 min. In different conditions, cells expressing single Cys mutants showed differential FM-labeling relative to the modification of Band 3 (Ma et al., 2006), which showed little variation in the samples ( $7.7\% \pm 0.4\%$  of total cellular fluorescence).

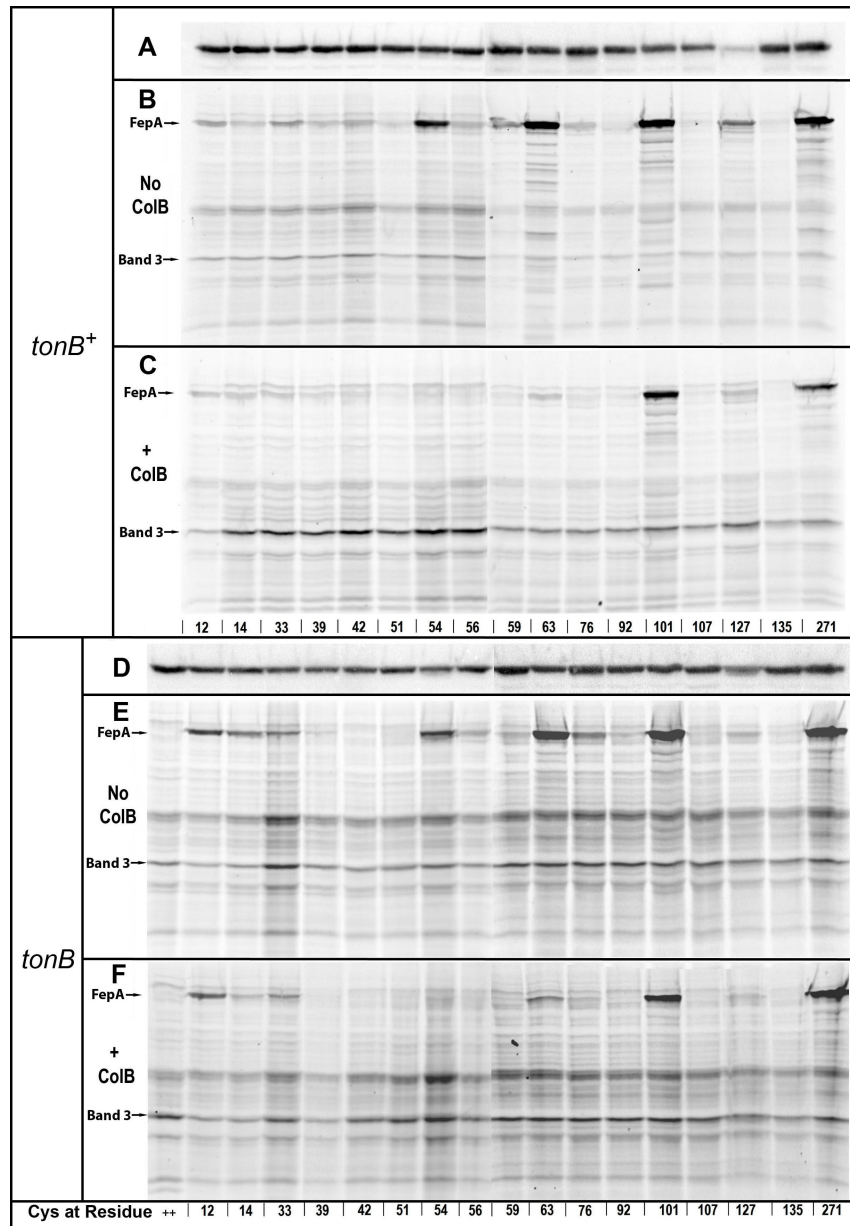

**Figure S3. Representative images from immunoblots and gels, which when quantified, produced Fig. 2. A and D. Expression of FepA Cys mutants in OKN3 (*tonB*<sup>+</sup>; A) and OKN13 (*tonB*; D).** Synthesis of FepA in was visualized as in Fig. S2. The images in these panels, and those in others in this figure, are composites from 2 separate immunoblots or gels (gel 1: residues 12-56; gel 2: 59-271); residue 271 is included as an internal positive control. The expression levels of wild-type FepA (++) and the Cys substitution mutant proteins (enumerated) were equivalent, but lower in OKN13 than in OKN3. **B and C. FM-labeling of Cys mutant proteins in OKN3 at 37 °C, ± ColB.** Bacteria were prepared as in Fig. S2, but incubated at 37 °C for 1 min in the absence (B) or presence (C) of ColB before FM was added for 15 min. **E and F. FM-labeling of Cys mutant proteins in OKN13 at 37 °C, ± ColB.** Cells were manipulated as Fig. S2: after resuspension in cold PBS they were incubated for 30 min at 37 °C in the absence (E) or presence (F) of ColB, prior to exposure to FM at 37 °C for 15 min.

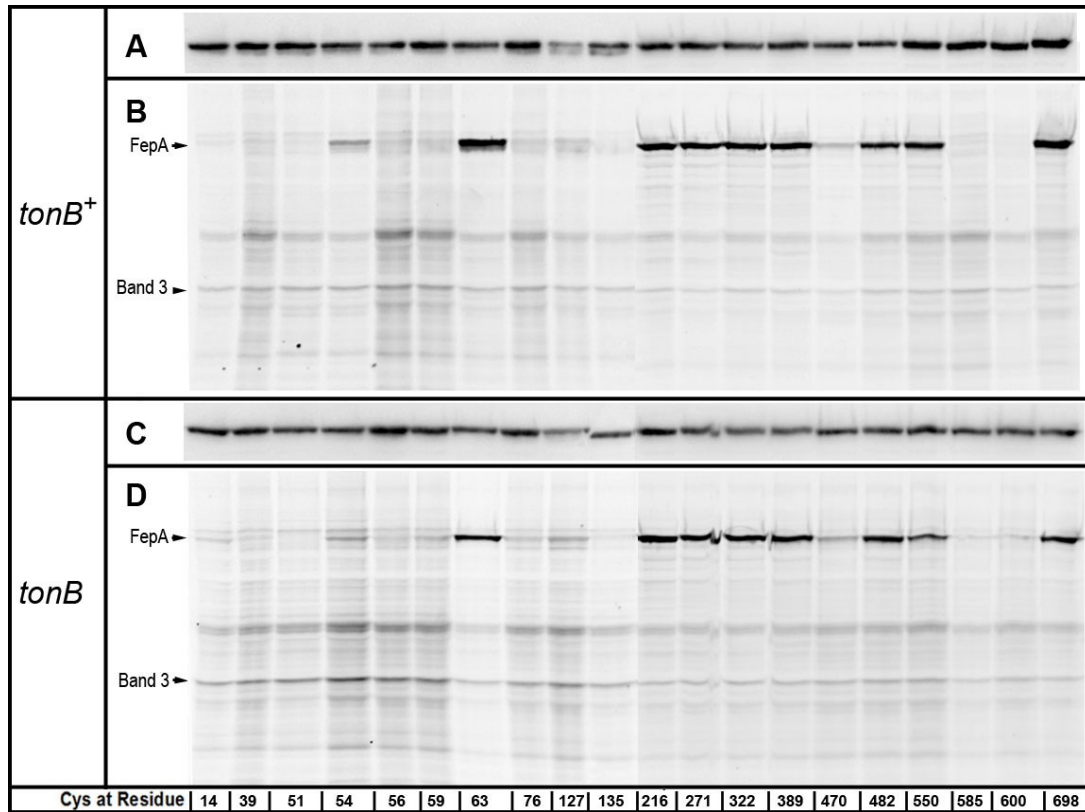

**Figure S4. Representative images from scanned immunoblots and gels, which when quantified, produced Fig. 3. A and C. Expression of FepA Cys mutants in OKN3 (*tonB*<sup>+</sup>; A) and OKN13 (*tonB*; D). Synthesis of FepA in was visualized as in Fig. S2. The images in these panels, and those in other panels in this figure, are composites from 2 separate immunoblots or gels (gel 1: residues 14-135; gel 2: 216-298). The expression levels of the Cys substitution mutant proteins (enumerated) were equivalent, but lower in OKN13 than in OKN3. B and D. Comparison of fluoresceination of Cys side chains in OKN3 (*tonB*<sup>+</sup>; B) and OKN13 (*tonB*; D) bacteria at 37 °C. Cells were manipulated as Fig. S2: after resuspension in cold PBS they were subjected to FM-labeling at 37 °C for 30 min.**

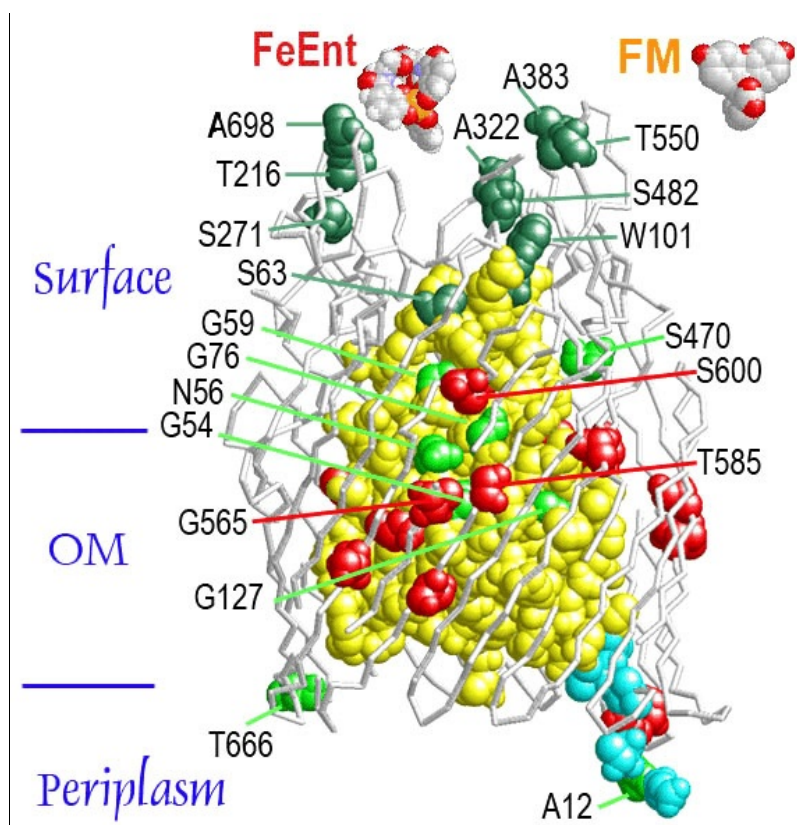

**Figure S5. Relative accessibility of residues in FepA to modification by FM. A.** The N-domain is yellow and the C-domain is white; the TonB-box (amino acids 11- 17) is cyan. **Left.** The positions of 27 Cys substitutions (among a total of 35, 8 are not discernible in this view) are shown in space-filling format on a backbone representation of FepA tertiary structure. The most reactive residues are colored dark green, and less intensely fluoresceinated residues are light green; for clarity, unreactive Cys substitutions (red) are not labeled.
